# Supplementary material for: Risk of pre-eclampsia and impact of disease activity and antirheumatic treatment in women with rheumatoid arthritis, axial spondylarthritis and psoriatic arthritis: a collaborative matched cohort study from Sweden and Denmark
Source: HighWire-hosted journal article supplement (doi:10.1136/rmdopen-2022-002445), 2022-11-01
Supplement: rmdopen-2022-002445supp001_data_supplement.pdf [file rmdopen-2022-002445supp001_data_supplement.pdf]

*Supplementary to Risk of Pre-eclampsia and Impact of Disease Activity and Anti-rheumatic Treatment in Women with Rheumatoid Arthritis, Axial Spondylarthritis, and Psoriatic Arthritis - A Collaborative Matched Cohort Study from Sweden and Denmark*

*Supplementary to*  
**Risk of Pre-eclampsia and Impact of Disease Activity and Anti-rheumatic Treatment in Women with Rheumatoid Arthritis, Axial Spondylarthritis, and Psoriatic Arthritis**  
**- A Collaborative Matched Cohort Study from Sweden and Denmark**

Anne Emilie Secher\*, Fredrik Granath\*, Bente Glinborg, Ane Lilleøre Rom,  
Merete Lund Hetland\*\*, Karin Hellgren\*\*

\* = Shared first authorship; \*\* = Shared last authorship

|                                           |    |
|-------------------------------------------|----|
| <i>Supplementary Table S1</i> .....       | 2  |
| <i>Supplementary Table S2</i> .....       | 3  |
| <i>Supplementary Table S3</i> .....       | 4  |
| <i>Supplementary Table S4</i> .....       | 5  |
| <i>Supplementary Table S5</i> .....       | 6  |
| <i>Supplementary Table S6</i> .....       | 7  |
| <i>Supplementary Table S7</i> .....       | 8  |
| <i>Supplementary Table S8</i> .....       | 9  |
| <i>Supplementary Table S9</i> .....       | 9  |
| <i>Supplementary Table S10</i> .....      | 10 |
| <i>Supplementary Table S11</i> .....      | 11 |
| <i>References for Supplementary</i> ..... | 12 |

Supplementary to Risk of Pre-eclampsia and Impact of Disease Activity and Anti-rheumatic Treatment in Women with Rheumatoid Arthritis, Axial Spondylarthritis, and Psoriatic Arthritis - A Collaborative Matched Cohort Study from Sweden and Denmark

## Supplementary Table S1

Description of relevant registers with patient level information according to the personal identification number

---

### SWEDEN

#### SRQ: The Swedish Rheumatology Quality Register

The SRQ was initially an early rheumatoid arthritis (RA) and a bDMARD register, but, eventually, opened to all inflammatory diseases regardless of treatment. The treating rheumatologist enters information on diagnosis and disease activity at regular follow-up visits as well as start and stop dates of anti-rheumatic treatments. Estimations indicate that more than 80 % of all Swedish RA patients, and >90% of all patients with RA treated with bDMARD are included in SRQ. [1,2]

#### The Swedish Medical Birth Register

The Swedish Medical Birth Register includes information from more than 95% of all births in Sweden ( $\geq$  gestational week 28 before July 2008 or  $\geq$  gestational week 22 since July 2008) since 1973. Information is collected prospectively from first visit at prenatal care and throughout pregnancy, delivery, and the neonatal period. The Medical Birth Register holds information on last menstrual period gestational age, preterm birth, mode of delivery, stillbirth, birth weight, congenital malformation, Apgar scores, and neonatal morbidity and mortality. The register also provides information on maternal characteristics such as age, smoking, body mass index (BMI), country of birth, and parity.[3]

#### The Swedish National Patient Register

The Swedish National Patient Register is a nationwide register holding information of all hospital discharges since 1987. Since 2001 the register also includes visits and diagnoses in specialist outpatient care. Diagnoses are coded according to ICD-10 (International Classification of Diseases, 10th revision) since 1997. [4]

#### The Swedish Prescribed Drug Register

The Swedish Prescribed Drug Register is a nationwide register established July 2005. It contains information on all dispensed prescriptions at Swedish pharmacies, including date and the ATC-code (Anatomical Therapeutic Chemical Classification System) of the drug. The register does not include data on drugs used in hospital and only partially drugs administered in hospital day-care units. Biologic Disease-Modifying Anti-Rheumatic Drug (bDMARD) given as infusions in hospital/day-care units are not registered in the Prescribed Drug Register. [5]

#### The Swedish population and death register, education register

Statistics Sweden maintains individual-based statistics on residency in Sweden since the early 1960s. The National Board of Health and Welfare maintains a register of dates and causes of deaths since the early 1960s. It also includes the education of Swedish citizens. [6]

### DENMARK

#### DANBIO: The Danish Rheumatology Register

The DANBIO registry is a Danish rheumatological quality register with nationwide coverage established in 2000. Since 2006 it has been mandatory to register rheumatologic patients treated with bDMARDs. Since 2005, all newly diagnosed patients with chronic inflammatory arthritis have been included. [7] The register holds information on treatment (type, dose, start and stop dates), disease activity at start of treatment and at follow-up visits collected by the treating rheumatologist. 95% of all RA patients in Denmark are registered in DANBIO. [8]

#### The Danish Medical Birth Register

The Danish Medical Birth Register is a nationwide register including information on live and still births in Denmark since 1973. Since 1973, all births have been registered in the Medical Birth Register. In Denmark, the Medical Birth Register holds information on maternal characteristics, paternal information, and pregnancy outcomes related to mother and child, collected prospectively from first antenatal visit until post-partum. Still births have been included in the Medical Birth Register from gestational week 22+0 since April 2004. [9]

#### The Danish National Patient Register

The Danish National Patient Register is a nationwide register established in 1977 and includes, for administrative purposes, dates of hospital admission and discharge, procedures, and up to 20 diagnoses coded by physicians at discharge according to ICD-8 until the end of 1993 and ICD-10 thereafter. Diagnoses from hospital outpatient visits have been included in the registry since 1995. [10,11]

#### The Danish National Prescription Register

The Prescribed Drug Register is a nationwide register holding information on all prescriptions filled at Danish pharmacies 2004, and data include, among others, date, dose, and ATC-code. In Denmark, all bDMARDs are provided free of charge to the patient through the hospital department responsible for the treatment. Information on bDMARDs are not included in the Prescribed Drug Register [12,13]

#### The Civil Registration System

The Danish civil registration system holds information on the total Danish population and contains recently updated information including personal civil registration number (CPR number, i.e. personal identification number assigned to all citizens living in Denmark), name, address including postal code, vital status, and emigration. The CPR also contains information about the CPR number of close relatives (legally registered father, mother and children). [14]

#### Register of highest educational level from Statistics Denmark

Statistics Denmark is an institution under the Danish Government responsible for conducting statistical analyses on the Danish society in a broad range of subjects including social and economic subjects. For this study we included information on highest educational level as a proxy for socioeconomic status. Statistics Denmark also provide servers for secure storage, access, and processing of sensitive data. For this study hosting of all data was at Statistics Denmark. [15]

---

Supplementary to Risk of Pre-eclampsia and Impact of Disease Activity and Anti-rheumatic Treatment in Women with Rheumatoid Arthritis, Axial Spondyloarthritis, and Psoriatic Arthritis - A Collaborative Matched Cohort Study from Sweden and Denmark

## Supplementary Table S2

Data sources and definitions

| Variable                                                         | Description                                                                                                                                                                                                                                                                                                                                                                                                                                                                                                                                                                                               |
|------------------------------------------------------------------|-----------------------------------------------------------------------------------------------------------------------------------------------------------------------------------------------------------------------------------------------------------------------------------------------------------------------------------------------------------------------------------------------------------------------------------------------------------------------------------------------------------------------------------------------------------------------------------------------------------|
| <b>Registry: SRQ/DANBIO</b>                                      |                                                                                                                                                                                                                                                                                                                                                                                                                                                                                                                                                                                                           |
| Rheumatoid arthritis (RA)                                        | A rheumatology-based diagnosis of maternal RA (ICD-10: M05, M06) according to SRQ or DANBIO with a pregnancy occurring after the diagnosis of RA,                                                                                                                                                                                                                                                                                                                                                                                                                                                         |
| Axial Spondyloarthritis (AxSpA)                                  | A rheumatology-based diagnosis of maternal AxSpA (ICD-10: M45, M46.8, M46.9) according to SRQ or DANBIO with a pregnancy occurring after the diagnosis of AxSpA.                                                                                                                                                                                                                                                                                                                                                                                                                                          |
| Psoriatic arthritis (PsA)                                        | A rheumatology-based diagnosis of maternal PsA (ICD-10: L40.5, M07.0, M07.1, M07.3) according to SRQ or DANBIO with a pregnancy occurring after the diagnosis of PsA.                                                                                                                                                                                                                                                                                                                                                                                                                                     |
| 28-joint Disease Activity Score CRP adjusted (DAS28-CRP)         | 0-10. Defined as DAS28-CRP minus patient's global VAS. Low <3.2, High ≥3.2, Missing. Maximal value during pregnancy was extracted. If CRP was missing in relation to a visit in DANBIO we obtained CRP value from the Danish Register of Laboratory Results for Research if available within a window of visit date±30 days.                                                                                                                                                                                                                                                                              |
| Health Assessment Questionnaire (HAQ)                            | 0-3. 20 questions in eight categories of functioning that represent a comprehensive set of functional activities. For this study we defined low functional status as HAQ <1, high as HAQ ≥1, and Missing. HAQ can be elevated up to 0.5 by pregnancy alone. [16] Maximal value during pregnancy was extracted.                                                                                                                                                                                                                                                                                            |
| C-Reactive protein (CRP)                                         | Mg/L. Low <10, High ≥10, Missing. In Denmark. As registered in SRQ/DANBIO. Maximal value during pregnancy was extracted.                                                                                                                                                                                                                                                                                                                                                                                                                                                                                  |
| Disease load                                                     | High: HAQ≥1, CRP≥10 mg/L, and/or DAS28-CRP≥3.2<br>Low: a) Disease load ≠ high, b) HAQ<1, CRP<10 mg/L, and/or DAS28-CRP<3.2<br>Missing: Missing data on HAQ, CRP, and DAS28-CRP                                                                                                                                                                                                                                                                                                                                                                                                                            |
| <b>Registry: Medical Birth Register</b>                          |                                                                                                                                                                                                                                                                                                                                                                                                                                                                                                                                                                                                           |
| Time of conception                                               | Time of conception was calculated as gestational age zero days based on the gestational age at birth. Gestational age at birth in the Medical Birth Register is estimated based on ultrasonography or, if ultrasonography was unavailable, by the recorded date of the first day of the last menstrual period.                                                                                                                                                                                                                                                                                            |
| Maternal age                                                     | Maternal age (years) at delivery                                                                                                                                                                                                                                                                                                                                                                                                                                                                                                                                                                          |
| Parity                                                           | At time of conception. Nulliparous, Primi/Multiparous, Missing                                                                                                                                                                                                                                                                                                                                                                                                                                                                                                                                            |
| Calendar period of delivery                                      | 2006-2009, 2010-2012, 2013-2015, 2016-2018                                                                                                                                                                                                                                                                                                                                                                                                                                                                                                                                                                |
| Body Mass Index (BMI)                                            | Kg/m <sup>2</sup> . Calculated from measured weight and self-reported height at the first antenatal visit. Underweight < 18.5 ≤ Normal weight < 25 ≤ Overweight < 30 ≤ Obese, Missing.                                                                                                                                                                                                                                                                                                                                                                                                                    |
| Smoking in early pregnancy                                       | Reported at the first antenatal visit. Smoker, Non-smoker, Missing.                                                                                                                                                                                                                                                                                                                                                                                                                                                                                                                                       |
| <b>Registry: Educational</b>                                     |                                                                                                                                                                                                                                                                                                                                                                                                                                                                                                                                                                                                           |
| Educational level                                                | Mothers highest education level at time of delivery. >12 years, ≤12 years, Missing.                                                                                                                                                                                                                                                                                                                                                                                                                                                                                                                       |
| <b>REGISTRY: National Patient Register</b>                       |                                                                                                                                                                                                                                                                                                                                                                                                                                                                                                                                                                                                           |
| Pre-eclampsia                                                    | One or more diagnosis of pre-eclampsia or eclampsia. ICD-10 O14.0-O15.9. Pre-eclampsia superimposed on chronic hypertension was not included (ICD-10 O11). The Danish National Patient Register has a sensitivity of 69% and specificity of 99% for pre-eclampsia. [17] Pre-eclampsia was further classified based on severity [18] and timing of delivery. [19–21] Moderate pre-eclampsia: ICD-10 O14.0 or O14.9 Severe pre-eclampsia: ICD-10 O14.1, O14.2, or O15.0-15.9 Early pre-eclampsia: pre-eclampsia and delivery <34 gestational weeks Late pre-eclampsia: pre-eclampsia and delivery ≥34 weeks |
| Chronic inflammatory arthritis (Exclusion criteria for controls) | ICD-10 codes<br>RA: M05, M06.0, M06.2, M06.3, M06.8, M06.9, M12.3<br>PsA: L40.5, M07.0, M07.1, M07.3<br>AxSpA: M45, M46.0, M46.1, M46.8, M46.9<br>Juvenile Idiopathic Arthritis: M08, M09<br>Polyarthritis: M13.0                                                                                                                                                                                                                                                                                                                                                                                         |

**Abbreviations:** DANBIO, the Danish Rheumatology Register; ICD-10, International Classification of Diseases, 10th revision; SRQ, Swedish Rheumatology Quality register; VAS, Visual Analogue Scale.

Supplementary to Risk of Pre-eclampsia and Impact of Disease Activity and Anti-rheumatic Treatment in Women with Rheumatoid Arthritis, Axial Spondylarthritis, and Psoriatic Arthritis - A Collaborative Matched Cohort Study from Sweden and Denmark

### Supplementary Table S3

Description of linkage procedure

---

#### SWEDEN

For Sweden, we identified all women diagnosed with RA, AxSpA, and PsA (**Supplementary Table S2**) from an existing linkage comprising all individuals with chronic inflammatory arthritis identified in SRQ and with randomly sampled comparators from the general population free from chronic inflammatory arthritis (**Supplementary Table S2**) at the time of sampling that is at the date of diagnosis in National Patient Register of the index patient and the same data for the comparators. The comparators in this linkage were originally matched 1:5 on age, residential area, and sex. [22] In the Swedish Medical Birth Register, we then sampled all pregnancies in RA, AxSpA, and PsA exposed women within the study period (January 1<sup>st</sup>, 2007, up until December 31<sup>st</sup>, 2017 in) to identify the Swedish RA, AxSpA, and PsA pregnancy cohorts, respectively. Afterwards, we generated the three Swedish control pregnancy cohorts by identifying 10 pregnancies of women from the existing linkage to each RA, PsA, and AxSpA exposed pregnancy matched on maternal age, parity, and birth year. Thereafter we pooled the Swedish and Danish pregnancy cohorts at Statistics Denmark's secure servers (**Figure 1, main**). [23]

---

#### DENMARK

For Denmark, we identified all women diagnosed with RA, AxSpA, and PsA (**Supplementary Table S2**) in DANBIO. Statistics Demark performed a linkage of these women to the Medical Birth Register and sampled all pregnancies in these women within the study period (January 1<sup>st</sup>, 2006, up until December 31<sup>st</sup>, 2018). Afterwards Statistics Denmark identified 35 control pregnancies from the Medical Birth Register to each disease exposed pregnancy matched on maternal age, parity, and year of delivery. Among the healthy controls we excluded pregnancies of women who were diagnosed with chronic inflammatory arthritis (**Supplementary Table S2**) in the National Patient Register before conception, and we generated the three Danish control pregnancy cohorts by identifying 10 pregnancies to each disease exposed pregnancy matched on maternal age, parity and birth. All pregnancies were linked to the registries of relevance using the Danish civil registration number. Afterwards, the Swedish and Danish pregnancy cohorts were pooled at Statistics Denmark's secure servers (**Figure 1, main**). [23]

---

**Abbreviations:** AxSpA, Axial Spondyloarthritis; PsA, Psoriatic Arthritis; RA, Rheumatoid Arthritis.

Supplementary to Risk of Pre-eclampsia and Impact of Disease Activity and Anti-rheumatic Treatment in Women with Rheumatoid Arthritis, Axial Spondylarthritis, and Psoriatic Arthritis - A Collaborative Matched Cohort Study from Sweden and Denmark

## Supplementary Table S4

Data sources and definitions of anti-rheumatic drugs

| Anti-rheumatic therapy                                                 | SWEDEN                                                                                                                                                                                                                                                                                                                                                                                                                                                                                                                                                                                                                                      | DENMARK                                                                                                                                                                                                                                                                                                                                                                                                                                                                                                                                                                                                                                                                                                                                                                             |
|------------------------------------------------------------------------|---------------------------------------------------------------------------------------------------------------------------------------------------------------------------------------------------------------------------------------------------------------------------------------------------------------------------------------------------------------------------------------------------------------------------------------------------------------------------------------------------------------------------------------------------------------------------------------------------------------------------------------------|-------------------------------------------------------------------------------------------------------------------------------------------------------------------------------------------------------------------------------------------------------------------------------------------------------------------------------------------------------------------------------------------------------------------------------------------------------------------------------------------------------------------------------------------------------------------------------------------------------------------------------------------------------------------------------------------------------------------------------------------------------------------------------------|
|                                                                        | The Prescribed Drug Register holds dispensed prescriptions with a typical filling for chronic conditions lasting three months' use. In SRQ start and stop dates are registered by the treating rheumatologist. We combined both data sources and considered the Prescribed Drug Register the more valid source. Validation through SRQ regarding treatment start and stop before and during pregnancy were done. In Sweden, drugs administered intravenously are given at specialist day care units at the hospitals and are therefore not registered in the Prescribed Drug Register, thus this information was solely collected from SRQ. | The Prescribed Drug Register holds dispensed prescriptions typically lasting three months' use. In DANBIO start and stop dates are registered by the treating rheumatologist. We combined both data sources and considered the Prescribed Drug Register the more valid source. DANBIO was used to provide data on exact dates for treatment stops before and during pregnancy. DMARDs administered subcutaneously, intramuscularly, or intravenously are only registered in the National Patient Register and DANBIO. For bDMARDs, the National Patient Register constituted the main source. A notification of bDMARDs in the National Patient Register assumes supply of eight weeks' treatment. Validation through DANBIO regarding treatment stops before and during pregnancy. |
| Oral corticosteroids (CS)                                              | <b>Registry:</b> Prescribed Drug Register and SRQ<br><b>ATC-code:</b> H02                                                                                                                                                                                                                                                                                                                                                                                                                                                                                                                                                                   | <b>Registry:</b> Prescribed Drug Register and DANBIO<br><b>ATC-code:</b> H02                                                                                                                                                                                                                                                                                                                                                                                                                                                                                                                                                                                                                                                                                                        |
| Conventional synthetic Disease-Modifying Anti-Rheumatic Drug (csDMARD) | <b>Registry:</b> Prescribed Drug Register and SRQ<br><b>ATC-codes:</b><br>Sulfasalazine: A07EC01-A07EC04<br>Leflunomide: L04AA13<br>Ciclosporin: L04AD01<br>Azathioprine: L04AX01, L01BB01<br>Methotrexate: L01BA01, L04AX03<br>Antimalarial drugs: P01BA01, P01BA02<br>Mycophenolate: L04AA06                                                                                                                                                                                                                                                                                                                                              | <b>Registry:</b> Prescribed Drug Register, National Patient Register, and DANBIO<br><b>ATC-codes:</b><br>Sulfasalazine: A07EC01-A07EC04<br>Leflunomide: L04AA13<br>Ciclosporin: Only from DANBIO<br>Azathioprine: L04AX01, L01BB01<br>Methotrexate: L01BA01, L04AX03<br>Antimalarial drugs: P01BA01, P01BA02<br>Mycophenolate: L04AA06                                                                                                                                                                                                                                                                                                                                                                                                                                              |
| Biologic Disease-Modifying Anti-Rheumatic Drug (bDMARD)                | <b>Registry:</b> Prescribed Drug Register and SRQ<br><b>ATC-codes:</b><br>Etanercept: L04AB01<br>Infliximab: from SRQ (L04AB02)<br>Adalimumab: L04AB04<br>Certolizumab-pegol: L04AB05<br>Golimumab: L04AB06<br>Tocilizumab: from SRQ (L04AC07)<br>Abatacept: L04AA24<br>Rituximab: from SRQ (L01XC02)                                                                                                                                                                                                                                                                                                                                       | <b>Registry:</b> National Patient Register and DANBIO<br><b>Treatment codes:</b><br>Etanercept: BOHJ18A2<br>Infliximab: BOHJ18A1<br>Adalimumab: BOHJ18A3<br>Certolizumab-pegol: BOHJ18A5<br>Golimumab: BOHJ18A4<br>Tocilizumab: BOHJ18B2<br>Abatacept: BOHJ18C1<br>Rituximab: BOHJ11                                                                                                                                                                                                                                                                                                                                                                                                                                                                                                |

**Abbreviations:** ATC, Anatomical Therapeutic Chemical Classification System; DANBIO, the Danish Rheumatology Register; SRQ, Swedish Rheumatology Quality register.

Supplementary to Risk of Pre-eclampsia and Impact of Disease Activity and Anti-rheumatic Treatment in Women with Rheumatoid Arthritis, Axial Spondylarthritis, and Psoriatic Arthritis - A Collaborative Matched Cohort Study from Sweden and Denmark

## Supplementary Table S5

Maternal characteristics in RA, AxSpA, PsA, and control singleton pregnancies in Sweden, n (%)

| Sweden                           | RA                | Controls <sup>1</sup> | AxSpA           | Controls <sup>1</sup> | PsA             | Controls <sup>1</sup> |
|----------------------------------|-------------------|-----------------------|-----------------|-----------------------|-----------------|-----------------------|
| N                                | 1104              | 11040                 | 431             | 4310                  | 233             | 2330                  |
| <b>Maternal age (years)</b>      |                   |                       |                 |                       |                 |                       |
| ≤24                              | 23 (2.1)          | 230 (2.1)             | 21 (4.9)        | 210 (4.9)             | 18 (7.7)        | 180 (7.7)             |
| 25-29                            | 226 (20.5)        | 2260 (20.5)           | 117 (27.1)      | 1170 (27.1)           | 55 (26.6)       | 550 (26.6)            |
| 30-34                            | 444 (40.2)        | 4440 (40.2)           | 176 (40.8)      | 1760 (40.8)           | 74 (31.8)       | 740 (31.8)            |
| >34                              | 411 (37.2)        | 4110 (37.2)           | 117 (27.1)      | 1170 (27.1)           | 86 (36.9)       | 860 (36.9)            |
| <b>Calendar year of delivery</b> |                   |                       |                 |                       |                 |                       |
| 2006-2009                        | 188 (17.0)        | 1880 (17.0)           | 37 (8.6)        | 370 (8.6)             | 22 (9.4)        | 220 (9.4)             |
| 2010-2012                        | 299 (27.1)        | 2990 (27.1)           | 72 (16.7)       | 720 (16.7)            | 46 (19.7)       | 460 (19.7)            |
| 2013-2015                        | 330 (29.9)        | 3300 (29.9)           | 169 (39.2)      | 1690 (39.2)           | 79 (33.9)       | 790 (33.9)            |
| 2016-2018                        | 287 (26.0)        | 2870 (26.0)           | 153 (35.5)      | 1530 (35.5)           | 86 (36.9)       | 860 (36.9)            |
| <b>Parity</b>                    |                   |                       |                 |                       |                 |                       |
| Nulliparous                      | 488 (44.2)        | 4880 (44.2)           | 200 (46.4)      | 2000 (46.4)           | 93 (39.9)       | 930 (39.9)            |
| Primip/Multiparous               | 616 (55.8)        | 6160 (55.8)           | 231 (53.6)      | 2310 (53.6)           | 140 (60.1)      | 1400 (60.1)           |
| Missing                          | 0 (0.0)           | 0 (0.0)               | 0 (0.0)         | 0 (0.0)               | 0 (0.0)         | 0 (0.0)               |
| <b>BMI (kg/m<sup>2</sup>)</b>    |                   |                       |                 |                       |                 |                       |
| <18.5                            | 93 (8.4)          | 845 (7.7)             | 41 (9.5)        | 369 (8.6)             | 19 (8.2)        | 152 (6.5)             |
| 18.5-24.9                        | 543 (49.2)        | 5244 (47.5)           | 197 (45.7)      | 2047 (47.5)           | 91 (39.1)       | 1113 (47.8)           |
| 25.0-29.9                        | 264 (23.9)        | 2632 (23.8)           | 115 (26.7)      | 1023 (23.7)           | 70 (30.0)       | 570 (24.9)            |
| ≥30.0                            | 116 (10.5)        | 1379(12.5)            | 45 (10.4)       | 526 (12.2)            | 35 (15.0)       | 305 (13.1)            |
| Missing                          | 88 (8.0)          | 940 (8.5)             | 33 (7.7)        | 345 (8.0)             | 18 (7.7)        | 190 (8.2)             |
| <b>Smoking</b>                   |                   |                       |                 |                       |                 |                       |
| Non-smoker                       | 1015 (91.9)       | 10002 (90.6)          | 388 (90.0)      | 3872 (89.8)           | 195 (83.7)      | 2093 (89.8)           |
| Smoker                           | 32 (2.9)          | 459 (4.2)             | 21 (4.9)        | 186 (4.3)             | 19 (8.2)        | 99 (4.2)              |
| Missing                          | 57 (5.2)          | 579 (5.2)             | 22 (5.1)        | 252 (5.8)             | 19 (8.2)        | 138 (5.9)             |
| <b>Highest educational level</b> |                   |                       |                 |                       |                 |                       |
| >12 years                        | 420 (38.0)        | 4190 (38.0)           | 168 (39.0)      | 1732 (40.2)           | 106 (45.5)      | 1026 (44.0)           |
| ≤12 years                        | 681 (61.7)        | 6808 (61.7)           | 263 (61.0)      | 2556 (59.3)           | 127 (54.5)      | 1297 (55.7)           |
| Missing                          | 3 (0.3)           | 42 (0.4)              | 0 (0.0)         | 22 (0.5)              | 0 (0.0)         | 7 (0.3)               |
| <b>Disease duration</b>          |                   |                       |                 |                       |                 |                       |
| Years, median (IQR)              | 6.9 (4.3, 10.6)   | NA                    | 9.1 (5.3, 13.9) | NA                    | 8.8 (5.3, 13.2) | NA                    |
| <b>Pre-pregnancy treatment</b>   |                   |                       |                 |                       |                 |                       |
| Untreated                        | No                | 230 (20.8)            | NA              | 172 (39.9)            | NA              | 63 (27.0)             |
| Monotherapy                      | CS                | 111 (10.1)            | NA              | 22 (5.1)              | NA              | 16 (6.9)              |
|                                  | csDMARD           | 138 (12.5)            | NA              | 30 (7.0)              | NA              | 30 (12.9)             |
|                                  | bDMARD            | 141 (12.8)            | NA              | 118 (27.4)            | NA              | 55 (23.6)             |
|                                  | CS+csDMARD        | 154 (13.9)            | NA              | 14 (3.2)              | NA              | 11 (4.7)              |
|                                  | CS+bDMARD         | 145 (13.1)            | NA              | 34 (7.9)              | NA              | 24 (10.3)             |
| Combination therapy              | csDMARD+bDMARD    | 75 (6.8)              | NA              | 25 (5.8)              | NA              | 22 (9.4)              |
|                                  | CS+csDMARD+bDMARD | 110 (10.0)            | NA              | 16 (3.7)              | NA              | 12 (5.2)              |
|                                  | bDMARD            |                       |                 |                       |                 |                       |

<sup>1</sup>Matched 1:10 on maternal age, parity, and year of delivery.

**Abbreviations:** AxSpA, Axial Spondyloarthritis; bDMARD, Biologic Disease-Modifying Anti-Rheumatic Drug; BMI, Body Mass Index; CS, oral corticosteroids; csDMARD, Conventional synthetic Disease-Modifying Anti-Rheumatic Drug; IQR, interquartile range; NA, Not Applicable; PsA, Psoriatic Arthritis; RA, Rheumatoid Arthritis.

Supplementary to Risk of Pre-eclampsia and Impact of Disease Activity and Anti-rheumatic Treatment in Women with Rheumatoid Arthritis, Axial Spondylarthritis, and Psoriatic Arthritis - A Collaborative Matched Cohort Study from Sweden and Denmark

## Supplementary Table S6

Maternal characteristics in RA, AxSpA, PsA, and control singleton pregnancies in Denmark, n (%)

| Denmark                          | RA             | Controls <sup>1</sup> | AxSpA           | Controls <sup>1</sup> | PsA            | Controls <sup>1</sup> |
|----------------------------------|----------------|-----------------------|-----------------|-----------------------|----------------|-----------------------|
| N                                | 635            | 6350                  | 388             | 3880                  | 256            | 2560                  |
| <b>Maternal age (years)</b>      |                |                       |                 |                       |                |                       |
| ≤24                              | 24 (3.8)       | 240 (3.8)             | 18 (4.6)        | 180 (4.6)             | 26 (10.2)      | 260 (10.2)            |
| 25-29                            | 145 (22.8)     | 1450 (22.8)           | 113 (29.1)      | 1130 (29.1)           | 83 (32.4)      | 830 (32.4)            |
| 30-34                            | 234 (36.9)     | 2340 (36.9)           | 172 (44.3)      | 1720 (44.3)           | 95 (31.2)      | 950 (31.2)            |
| >34                              | 232 (36.5)     | 2320 (36.5)           | 85 (21.9)       | 850 (21.9)            | 52 (20.3)      | 520 (20.3)            |
| <b>Calendar year of delivery</b> |                |                       |                 |                       |                |                       |
| 2006-2009                        | 54 (8.5)       | 540 (8.5)             | 16 (4.1)        | 160 (4.1)             | 6 (2.3)        | 60 (2.3)              |
| 2010-2012                        | 119 (18.7)     | 1190 (18.7)           | 56 (14.4)       | 560 (14.4)            | 33 (12.9)      | 330 (12.9)            |
| 2013-2015                        | 215 (33.9)     | 2150 (33.9)           | 125 (32.2)      | 1250 (32.2)           | 72 (28.1)      | 720 (28.1)            |
| 2016-2018                        | 247 (38.9)     | 2470 (38.9)           | 191 (49.2)      | 1910 (49.2)           | 145 (56.6)     | 1450 (56.6)           |
| <b>Parity</b>                    |                |                       |                 |                       |                |                       |
| Nulliparous                      | 278 (43.8)     | 2780 (43.8)           | 169 (43.6)      | 1690 (43.6)           | 119 (46.5)     | 1190 (46.5)           |
| Primi/Multiparous                | 352 (55.4)     | 3520 (55.4)           | 219 (56.4)      | 2190 (56.4)           | 134 (52.3)     | 1340 (52.3)           |
| Missing                          | 5 (0.8)        | 50 (0.8)              | 0 (0.0)         | 0 (0.0)               | 3 (1.2)        | 30 (1.2)              |
| <b>BMI (kg/m<sup>2</sup>)</b>    |                |                       |                 |                       |                |                       |
| <18.5                            | 24 (3.8)       | 230 (3.6)             | 17 (4.4)        | 163 (4.2)             | 4 (1.6)        | 104 (4.1)             |
| 18.5-24.9                        | 279 (43.9)     | 3189 (50.2)           | 181 (46.6)      | 1920 (49.5)           | 108 (42.2)     | 1270 (49.6)           |
| 25.0-29.9                        | 148 (23.3)     | 1296 (20.4)           | 85 (21.9)       | 831 (21.4)            | 65 (25.4)      | 515 (20.1)            |
| ≥30.0                            | 95 (15.0)      | 751 (11.8)            | 59 (15.2)       | 474 (12.2)            | 46 (18.0)      | 332 (13.0)            |
| Missing                          | 89 (14.0)      | 884 (13.9)            | 46 (11.9)       | 492 (12.7)            | 33 (12.9)      | 339 (13.2)            |
| <b>Smoking</b>                   |                |                       |                 |                       |                |                       |
| Non-smoker                       | 561 (88.3)     | 5599 (88.2)           | 336 (86.6)      | 3448 (88.9)           | 207 (80.9)     | 2226 (87.0)           |
| Smoker                           | 55 (8.7)       | 512 (8.1)             | 42 (10.8)       | 325 (8.4)             | 36 (14.1)      | 233 (9.1)             |
| Missing                          | 19 (3.0)       | 239 (3.8)             | 10 (2.6)        | 107 (2.8)             | 13 (5.1)       | 101 (3.9)             |
| <b>Highest educational level</b> |                |                       |                 |                       |                |                       |
| >12 years                        | 338 (53.2)     | 3381 (53.2)           | 196 (50.5)      | 1973 (50.9)           | 104 (40.6)     | 1207 (47.1)           |
| ≤12 years                        | 291 (45.8)     | 2628 (41.4)           | NA              | 1722 (44.4)           | NA             | 1211 (47.3)           |
| Missing                          | 6 (0.9)        | 341 (5.4)             | ≤3              | 185 (4.8)             | ≤3             | 142 (5.5)             |
| <b>Disease duration</b>          |                |                       |                 |                       |                |                       |
| Years, median (IQR)              | 5.6 (3.1, 9.2) | NA                    | 6.8 (3.7, 10.6) | NA                    | 4.9 (2.7, 8.6) | NA                    |
| <b>Pre-pregnancy treatment</b>   |                |                       |                 |                       |                |                       |
| Untreated                        | No             | 180 (28.3)            | NA              | 230 (59.3)            | NA             | 126 (49.2)            |
|                                  | CS             | 34 (5.4)              | NA              | 11 (2.8)              | NA             | 7 (2.7)               |
| Monotherapy                      | csDMARD        | 193 (30.4)            | NA              | 17 (4.4)              | NA             | 65 (25.4)             |
|                                  | bDMARD         | 44 (6.9)              | NA              | 91 (23.5)             | NA             | 21 (8.2)              |
|                                  | CS+csDMARD     | 74 (11.7)             | NA              | NA                    | NA             | 8 (3.1)               |
|                                  | CS+bDMARD      | 18 (2.8)              | NA              | 13 (3.4)              | NA             | 6 (2.3)               |
| Combination therapy              | csDMARD+       |                       |                 |                       |                |                       |
|                                  | bDMARD         | 59 (9.3)              | NA              | 17 (4.4)              | NA             | 15 (5.9)              |
|                                  | CS+csDMARD+    |                       |                 |                       |                |                       |
|                                  | bDMARD         | 33 (5.2)              | NA              | NA                    | NA             | 8 (3.1)               |

<sup>1</sup>Matched 1:10 on maternal age, parity, and year of delivery.

**Abbreviations:** AxSpA, Axial Spondylarthritis; bDMARD, Biologic Disease-Modifying Anti-Rheumatic Drug; BMI, Body Mass Index; CS, oral corticosteroids; csDMARD, Conventional synthetic Disease-Modifying Anti-Rheumatic Drug; IQR, interquartile range; NA, Not Applicable; PsA, Psoriatic Arthritis; RA, Rheumatoid Arthritis.

Supplementary to Risk of Pre-eclampsia and Impact of Disease Activity and Anti-rheumatic Treatment in Women with Rheumatoid Arthritis, Axial Spondylarthritis, and Psoriatic Arthritis - A Collaborative Matched Cohort Study from Sweden and Denmark

## Supplementary Table S7

Risk of moderate and severe pre-eclampsia in in RA, AxSpA, and PsA singleton pregnancies versus control singleton pregnancies

|                               | Pregnancies, n | Pre-eclampsia events, n (%) | Crude OR (95% CI)        | Adjusted OR (95% CI)     |
|-------------------------------|----------------|-----------------------------|--------------------------|--------------------------|
| <b>Severe pre-eclampsia</b>   |                |                             |                          |                          |
| RA                            | 1739           | 22 (1.3)                    | 1.33 (0.85, 2.09)        | 1.35 (0.84, 2.16)        |
| Controls                      | 17390          | 167 (1.0)                   | REF                      |                          |
| AxSpA                         | 819            | 12 (1.5)                    | 1.44 (0.78, 2.65)        | 1.19 (0.59, 2.39)        |
| Controls                      | 8190           | 84 (1.0)                    | REF                      |                          |
| PsA                           | 489            | 10 (2.1)                    | <b>2.01 (1.02, 3.99)</b> | <b>2.15 (1.03, 4.47)</b> |
| Controls                      | 4890           | 51 (1.1)                    | REF                      |                          |
| <b>Moderate pre-eclampsia</b> |                |                             |                          |                          |
| RA                            | 1739           | 45 (2.6)                    | 1.24 (0.91, 1.69)        | 1.23 (0.88, 1.72)        |
| Controls                      | 17390          | 363 (2.1)                   | REF                      |                          |
| AxSpA                         | 819            | 22 (2.7)                    | 1.20 (0.73-1.95)         | 1.16 (0.70, 1.92)        |
| Controls                      | 8190           | 183 (2.2)                   | REF                      |                          |
| PsA                           | 489            | 16 (3.3)                    | <b>2.10 (1.19, 3.70)</b> | 1.79 (0.92, 3.48)        |
| Controls                      | 4890           | 78 (1.6)                    | REF                      |                          |

Singleton pregnancies. One woman may contribute with one or more pregnancies. ORs were estimated using logistic regression and generalized estimation-equation method.

<sup>1</sup>Matched 1:10 on maternal age, parity, and year <sup>2</sup>Adjusted for country, maternal age, parity, year, BMI, smoking and education

**Abbreviations:** AxSpA, Axial Spondyloarthritis; BMI, Body Mass Index; CI, Confidence Interval; OR, Odds Ratio; PsA, Psoriatic Arthritis; RA, Rheumatoid Arthritis.



Supplementary to Risk of Pre-eclampsia and Impact of Disease Activity and Anti-rheumatic Treatment in Women with Rheumatoid Arthritis, Axial Spondylarthritis, and Psoriatic Arthritis - A Collaborative Matched Cohort Study from Sweden and Denmark

### Supplementary Table S8

Risk of pre-eclampsia in RA, AxSpA, and PsA singleton pregnancies versus control singleton pregnancies (Sweden)

| Sweden                | Pregnancies, n | Pre-eclampsia events, n (%) | Crude OR (95% CI) | Adjusted OR 1 <sup>2</sup> (95% CI) |
|-----------------------|----------------|-----------------------------|-------------------|-------------------------------------|
| RA                    | 1104           | 42 (3.8)                    | 1.31 (0.95, 1.82) | <b>1.42 (1.01, 2.00)</b>            |
| Controls <sup>1</sup> | 11040          | 326 (3.0)                   | REF               | REF                                 |
| AxSpA                 | 431            | 18 (4.2)                    | 1.35 (0.78, 2.31) | 1.25 (0.69, 2.28)                   |
| Controls <sup>1</sup> | 4310           | 134 (3.1)                   | REF               | REF                                 |
| PsA                   | 233            | 10 (4.3)                    | 1.49 (0.72, 3.07) | 1.54 (0.68, 3.47)                   |
| Controls <sup>1</sup> | 2330           | 68 (2.9)                    | REF               | REF                                 |

Singleton pregnancies. One woman may contribute with one or more pregnancies. ORs were estimated using logistic regression and generalized estimation-equation method.

<sup>1</sup>Matched 1:10 on maternal age, parity, and year <sup>2</sup>Adjusted for country, maternal age, parity, year, BMI, smoking and education

**Abbreviations:** AxSpA, Axial Spondylarthritis; BMI, Body Mass Index; CI, Confidence Interval; OR, Odds Ratio; PsA, Psoriatic Arthritis; RA, Rheumatoid Arthritis.

### Supplementary Table S9

Risk of pre-eclampsia in RA, AxSpA, and PsA singleton pregnancies versus control singleton pregnancies (Denmark)

| Denmark               | Pregnancies, n | Pre-eclampsia events, n | Crude OR (95% CI)        | Adjusted OR 1 <sup>2</sup> (95% CI) |
|-----------------------|----------------|-------------------------|--------------------------|-------------------------------------|
| RA                    | 635            | 25 (3.9)                | 1.20 (0.79, 1.83)        | 1.06 (0.66, 1.69)                   |
| Controls <sup>1</sup> | 6350           | 209 (3.3)               | REF                      | REF                                 |
| AxSpA                 | 388            | 16 (4.1)                | 1.24 (0.70, 2.20)        | 1.04 (0.57, 1.91)                   |
| Controls <sup>1</sup> | 3880           | 133 (3.4)               | REF                      | REF                                 |
| PsA                   | 256            | 16 (6.3)                | <b>2.71 (1.52, 4.85)</b> | <b>2.26 (1.12, 4.54)</b>            |
| Controls <sup>1</sup> | 2560           | 61 (2.4)                | REF                      | REF                                 |

Singleton pregnancies. One woman may contribute with one or more pregnancies. ORs were estimated using logistic regression and generalized estimation-equation method.

<sup>1</sup>Matched 1:10 on maternal age, parity, and year <sup>2</sup>Adjusted for country, maternal age, parity, year, BMI, smoking and education

**Abbreviations:** AxSpA, Axial Spondylarthritis; BMI, Body Mass Index; CI, Confidence Interval; OR, Odds Ratio; PsA, Psoriatic Arthritis; RA, Rheumatoid Arthritis.

Supplementary to Risk of Pre-eclampsia and Impact of Disease Activity and Anti-rheumatic Treatment in Women with Rheumatoid Arthritis, Axial Spondylarthritis, and Psoriatic Arthritis - A Collaborative Matched Cohort Study from Sweden and Denmark

## Supplementary Table S10

Risk of pre-eclampsia in RA, AxSpA, and PsA singleton pregnancies in relation to functional status and disease activity **within 180 days from time of conception (1st and 2nd trimester)** versus control singleton pregnancies

|                                                                      | Pregnancies, n | Pre-eclampsia events, n (%) | External comparison      |                                   | Internal comparison |                                   |
|----------------------------------------------------------------------|----------------|-----------------------------|--------------------------|-----------------------------------|---------------------|-----------------------------------|
|                                                                      |                |                             | Crude OR (95% CI)        | Adjusted OR <sup>1</sup> (95% CI) | Crude OR (95% CI)   | Adjusted OR <sup>1</sup> (95% CI) |
| <b>RA</b>                                                            |                |                             |                          |                                   |                     |                                   |
| CRP (mg/L)                                                           |                |                             |                          |                                   |                     |                                   |
| <10                                                                  | 391            | 21 (5.4)                    | 1.80 (1.16, 2.80)        | 1.79 (1.11, 2.88)                 | REF                 | REF                               |
| ≥10                                                                  | 203            | 9 (4.4)                     | 1.46 (0.75, 2.83)        | 1.49 (0.76, 2.89)                 | NA <sup>2</sup>     | NA <sup>2</sup>                   |
| Missing                                                              | 1145           | 37 (3.2)                    | 1.06 (0.76, 1.48)        | 1.05 (0.73, 1.51)                 | NA <sup>2</sup>     | NA <sup>2</sup>                   |
| HAQ                                                                  |                |                             |                          |                                   |                     |                                   |
| <1                                                                   | 433            | 18 (4.2)                    | 1.37 (0.85, 2.20)        | 1.36 (0.82, 2.28)                 | REF                 | REF                               |
| ≥1                                                                   | 157            | 13 (8.3)                    | <b>2.85 (1.60, 5.09)</b> | <b>2.30 (1.23, 4.28)</b>          | 2.08 (0.99, 4.38)   | 1.69 (0.76, 3.72)                 |
| Missing                                                              | 1149           | 36 (3.1)                    | 1.02 (0.73, 1.44)        | 1.06 (0.74, 1.53)                 | 0.75 (0.42, 1.33)   | 0.78 (0.42, 1.45)                 |
| DAS28-CRP <sup>3</sup>                                               |                |                             |                          |                                   |                     |                                   |
| <3.2                                                                 | 375            | 17 (4.5)                    | 1.50 (0.92, 2.45)        | 1.45 (0.86, 2.46)                 | REF                 | REF                               |
| ≥3.2                                                                 | 201            | 11 (5.5)                    | 1.83 (0.99, 3.38)        | <b>1.92 (1.03, 3.58)</b>          | 1.22 (0.56, 2.66)   | 1.32 (0.59, 2.97)                 |
| Missing                                                              | 1136           | 39 (3.4)                    | 1.10 (0.79, 1.53)        | 1.09 (0.77, 1.56)                 | 0.73 (0.41, 1.31)   | 0.75 (0.40, 1.40)                 |
| Disease load: any HAQ≥1, CRP≥10 mg/L, or DAS28-CRP <sup>3</sup> ≥3.2 |                |                             |                          |                                   |                     |                                   |
| Low (no)                                                             | 368            | 12 (3.3)                    | 1.07 (0.60, 1.90)        | 1.05 (0.56, 2.00)                 | REF                 | REF                               |
| High (yes)                                                           | 388            | 24 (6.2)                    | <b>2.08 (1.37, 3.17)</b> | <b>1.98 (1.27, 3.08)</b>          | 1.95 (0.96, 3.96)   | 1.88 (0.87, 4.04)                 |
| Missing <sup>4</sup>                                                 | 983            | 31 (3.2)                    | 1.03 (0.71, 1.49)        | 1.04 (0.70, 1.54)                 | 0.97 (0.49, 1.90)   | 0.99 (0.47, 2.07)                 |
| Controls <sup>5</sup>                                                | 17390          | 535 (3.1)                   | REF                      | REF                               | -                   | -                                 |
| <b>AxSpA</b>                                                         |                |                             |                          |                                   |                     |                                   |
| Disease load: any HAQ≥1 or CRP≥10 mg/L                               |                |                             |                          |                                   |                     |                                   |
| Low (no)                                                             | 169            | 8 (4.7)                     | 1.57 (0.81, 3.04)        | 1.23 (0.56, 2.68)                 | REF                 | REF                               |
| High (yes)                                                           | 118            | 3 (2.5)                     | 0.74 (0.25, 2.21)        | 0.56 (0.18, 1.71)                 | NA <sup>2</sup>     | NA <sup>2</sup>                   |
| Missing <sup>6</sup>                                                 | 532            | 23 (4.3)                    | 1.33 (0.84, 2.11)        | 1.32 (0.80, 2.18)                 | NA <sup>2</sup>     | NA <sup>2</sup>                   |
| Controls <sup>5</sup>                                                | 8190           | 267 (3.3)                   | REF                      | REF                               | -                   | -                                 |
| <b>PsA</b>                                                           |                |                             |                          |                                   |                     |                                   |
| Disease load: any HAQ≥1, CRP≥10 mg/L, or DAS28-CRP <sup>2</sup> ≥3.2 |                |                             |                          |                                   |                     |                                   |
| Low (no)                                                             | 94             | 4 (4.3)                     | 1.72 (0.62, 4.78)        | 2.08 (0.72, 5.97)                 | REF                 | REF                               |
| High (yes)                                                           | 85             | 5 (5.9)                     | 2.37 (0.95, 5.91)        | 1.81 (0.54, 6.04)                 | NA <sup>2</sup>     | NA <sup>2</sup>                   |
| Missing <sup>4</sup>                                                 | 310            | 17 (5.5)                    | <b>2.09 (1.20, 3.63)</b> | 1.79 (0.93, 3.47)                 | NA <sup>2</sup>     | NA <sup>2</sup>                   |
| Controls <sup>5</sup>                                                | 4890           | 129 (2.6)                   | REF                      | REF                               | -                   | -                                 |

Singleton pregnancies. One woman may contribute with one or more pregnancies. ORs were estimated using logistic regression and generalized estimation-equation method.

<sup>1</sup>Adjusted for country, maternal age, parity, year of delivery, BMI, smoking and education, <sup>2</sup>Not presented due to low numbers, <sup>3</sup>DAS28-CRP was calculated including CRP and without Global Health-Visual Analog Scale, <sup>4</sup>No registration of neither DAS28-CRP, HAQ, nor CRP, <sup>5</sup>Matched 1:10 on maternal age, parity, and year of delivery, <sup>6</sup>No registration of neither HAQ nor CRP.

**Abbreviations:** AxSpA, Axial Spondylarthritis; BMI, Body Mass Index; CI, Confidence Interval; CRP, C-Reactive Protein; DAS28-CRP, 28-joint Disease Activity Score CRP adjusted; HAQ, Health Assessment Questionnaire; NA, Not Applicable; OR, Odds Ratio; PsA, Psoriatic Arthritis; RA, Rheumatoid Arthritis.

Supplementary to Risk of Pre-eclampsia and Impact of Disease Activity and Anti-rheumatic Treatment in Women with Rheumatoid Arthritis, Axial Spondylarthritis, and Psoriatic Arthritis - A Collaborative Matched Cohort Study from Sweden and Denmark

### Supplementary Table S11

Treatment during pregnancy in RA, AxSpA, and PsA singleton pregnancies

|                                   |                   | RA         | Controls <sup>1</sup> | AxSpA      | Controls <sup>1</sup> | PsA        | Controls <sup>1</sup> |
|-----------------------------------|-------------------|------------|-----------------------|------------|-----------------------|------------|-----------------------|
|                                   | N                 | 1739       | 17390                 | 819        | 8190                  | 489        | 4890                  |
| <b>Treatment during pregnancy</b> |                   |            |                       |            |                       |            |                       |
| Untreated                         | No                | 607 (34.9) | NA                    | 488 (59.6) | NA                    | 282 (57.7) | NA                    |
|                                   | CS                | 269 (15.5) | NA                    | 58 (7.1)   | NA                    | 36 (7.4)   | NA                    |
| Monotherapy                       | csDMARD           | 216 (12.4) | NA                    | 49 (6.0)   | NA                    | 50 (10.2)  | NA                    |
|                                   | bDMARD            | 135 (7.8)  | NA                    | 124 (15.1) | NA                    | 57 (11.7)  | NA                    |
|                                   | CS+csDMARD        | 204 (11.7) | NA                    | 17 (2.1)   | NA                    | 19 (3.9)   | NA                    |
|                                   | CS+bDMARD         | 183 (10.5) | NA                    | 62 (7.6)   | NA                    | 25 (5.1)   | NA                    |
| Combination therapy               | csDMARD+bDMARD    | 45 (2.6)   | NA                    | 7 (0.9)    | NA                    | 11 (2.2)   | NA                    |
|                                   | CS+csDMARD+bDMARD | 80 (4.6)   | NA                    | 14 (1.7)   | NA                    | 9 (1.8)    | NA                    |

Treatment defined as any registration of one or more type of drug during pregnancy (simultaneously or not simultaneously). Singleton pregnancies. One woman may contribute with one or more pregnancies. <sup>1</sup>Matched 1:10 on maternal age, parity, and year of delivery. **Abbreviations:** AxSpA, Axial Spondylarthritis; bDMARD, biologic Disease-Modifying Anti-Rheumatic Drug; BMI, Body Mass Index; CS, oral corticosteroids; csDMARD, conventional synthetic Disease-Modifying Anti-Rheumatic Drug; IQR, interquartile range; NA, Not Applicable; PsA, Psoriatic Arthritis; RA, Rheumatoid Arthritis.

Supplementary to Risk of Pre-eclampsia and Impact of Disease Activity and Anti-rheumatic Treatment in Women with Rheumatoid Arthritis, Axial Spondylarthritis, and Psoriatic Arthritis - A Collaborative Matched Cohort Study from Sweden and Denmark

## References for Supplementary

- 1 Wadström H, Eriksson JK, Neovius M, *et al.* How good is the coverage and how accurate are exposure data in the Swedish Biologics Register (ARTIS)? *Scand J Rheumatol* 2015;**44**:22–8. doi:10.3109/03009742.2014.927918
- 2 Chatzidionysiou K, Hetland ML, Frisell T, *et al.* Opportunities and challenges for Real-World studies on chronic inflammatory joint diseases through data enrichment and collaboration between national registers: The Nordic example. *RMD Open* 2018;**4**. doi:10.1136/rmdopen-2018-000655
- 3 The Swedish Centre for Epidemiology. The Swedish Medical Birth Register: a summary of content and quality. Article no: 2003-112-3. 2013.
- 4 Ludvigsson JF, Andersson E, Ekblom A, *et al.* External review and validation of the Swedish national inpatient register. *BMC Public Health* 2011;**11**. doi:10.1186/1471-2458-11-450
- 5 Wettermark B, Hammar N, Fored CM, *et al.* The new Swedish Prescribed Drug Register Opportunities for pharmacoepidemiological research and experience from the first six months. *Pharmacoepidemiol Drug Saf* 2007;**16**:726–35. doi:10.1002/pds.1294
- 6 Ludvigsson JF, Almqvist C, Bonamy AKE, *et al.* Registers of the Swedish total population and their use in medical research. *Eur J Epidemiol* 2016;**31**:125–36. doi:10.1007/s10654-016-0117-y
- 7 Glinthborg B, Jensen DV, Engel S, *et al.* Self-protection strategies and health behaviour in patients with inflammatory rheumatic diseases during the COVID-19 pandemic: Results and predictors in more than 12 000 patients with inflammatory rheumatic diseases followed in the Danish DANBIO registry. *RMD Open* 2021;**7**:1505. doi:10.1136/rmdopen-2020-001505
- 8 Ibfelt EH, Jensen DV, Hetland ML. The Danish nationwide clinical register for patients with rheumatoid arthritis: DANBIO. *Clin Epidemiol* 2016;**8**:737–42. doi:10.2147/CLEP.S99490
- 9 Bliddal M, Broe A, Pottegård A, *et al.* The Danish Medical Birth Register. *Eur J Epidemiol* 2018;**33**:27–36. doi:10.1007/s10654-018-0356-1
- 10 Schmidt M, Schmidt SAJ, Sandegaard JL, *et al.* The Danish National patient registry: A review of content, data quality, and research potential. *Clin Epidemiol* 2015;**7**:449–90. doi:10.2147/CLEP.S91125
- 11 Lynge E, Sandegaard JL, Rebolj M. The Danish National Patient Register. *Scand J Public Health* 2011;**39**:30–3. doi:10.1177/1403494811401482
- 12 Wallach Kildemoes H, Toft Sørensen H, Hallas J. The Danish national prescription registry. *Scand J Public Health* 2011;**39**:38–41. doi:10.1177/1403494810394717
- 13 Johannesdottir SA, Horváth-Puhó E, Ehrenstein V, *et al.* Existing data sources for clinical epidemiology: The Danish National database of reimbursed prescriptions. *Clin Epidemiol* 2012;**4**:303–13. doi:10.2147/clep.s37587
- 14 Schmidt M, Pedersen L, Sørensen HT. The Danish Civil Registration System as a tool in epidemiology. *Eur. J. Epidemiol.* 2014;**29**:541–9. doi:10.1007/s10654-014-9930-3
- 15 Documentation of statistics: Highest Education Attained - Statistics Denmark. <https://www.dst.dk/en/Statistik/dokumentation/documentationofstatistics/highest-education-attained> (accessed 28 May 2021).
- 16 De Man YA, Hazes JMW, Van De Geijn FE, *et al.* Measuring disease activity and functionality during pregnancy in patients with rheumatoid arthritis. *Arthritis Care Res* 2007;**57**:716–22. doi:10.1002/art.22773
- 17 Klemmensen ÅK, Olsen SF, Østerdal ML, *et al.* Validity of preeclampsia-related diagnoses recorded in a national hospital registry and in a postpartum interview of the women. *Am J Epidemiol* 2007;**166**:117–24. doi:10.1093/aje/kwm139
- 18 Behrens I, Basit S, Lykke JA, *et al.* Hypertensive disorders of pregnancy and peripartum cardiomyopathy: A nationwide cohort study. *PLoS One* 2019;**14**. doi:10.1371/JOURNAL.PONE.0211857
- 19 Burton GJ, Redman CW, Roberts JM, *et al.* Pre-eclampsia: pathophysiology and clinical implications. *BMJ* 2019;**366**. doi:10.1136/BMJ.L2381
- 20 Rode L, Ekelund CK, Riishede I, *et al.* Prediction of preterm pre-eclampsia according to NICE and ACOG criteria: descriptive study of 597 492 Danish births from 2008 to 2017. *Ultrasound Obstet Gynecol* 2021;**58**:561–7. doi:10.1002/UOG.23693
- 21 Wang H, László KD, Gissler M, *et al.* Maternal hypertensive disorders and neurodevelopmental disorders in offspring: a population-based cohort in two Nordic countries. *Eur J Epidemiol* 2021;**36**:519–30. doi:10.1007/S10654-021-00756-2
- 22 Askling J, Fored CM, Geborek P, *et al.* Swedish registers to examine drug safety and clinical issues in RA. *Ann Rheum Dis* 2006;**65**:707–12. doi:10.1136/ard.2005.045872
- 23 Hellgren K, Secher AE, Glinthborg B, *et al.* Pregnancy outcomes in relation to disease activity and anti-rheumatic treatment strategies in women with rheumatoid arthritis. *Rheumatology* Published Online First: 3 December 2021. doi:10.1093/rheumatology/keab894
